# Supplementary material for: Surface functionalization of up-converting NaYF4 nanocrystals with chiral molecules
Source: Royal Society of Chemistry journal article supplement (doi:10.1039/c5ra19496b), 2016-01-01
Supplement: c5ra19496b1.pdf [file c5ra19496b1.pdf]

Electronic Supporting Information  
for  
**Surface Functionalization of Up-Converting NaYF<sub>4</sub> Nanocrystals with Chiral Molecules**

Dominika Wawrzyńczyk\*

*Advanced Materials Engineering and Modelling Group, Faculty of Chemistry, Wrocław University of Technology, Wybrzeże Wyspińskiego 27, 50-370 Wrocław,*  
corresponding author: dominika.wawrzynczyk@pwr.edu.pl

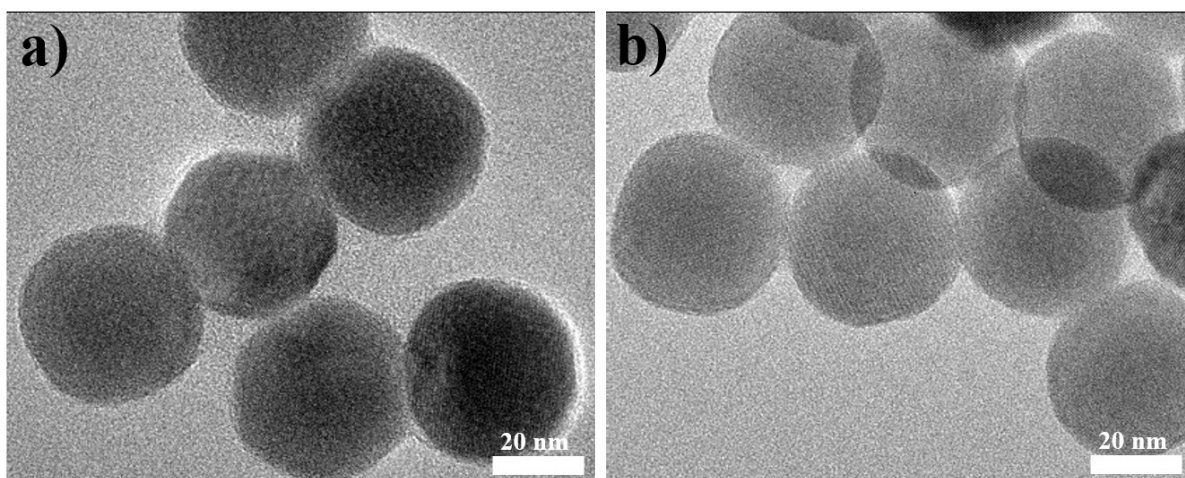

Fig.S1. TEM images of NaYF<sub>4</sub>:2%Er,20%Yb NPs before (a) and after (b) treatment with 3-Chloroperoxybenzoic acid.

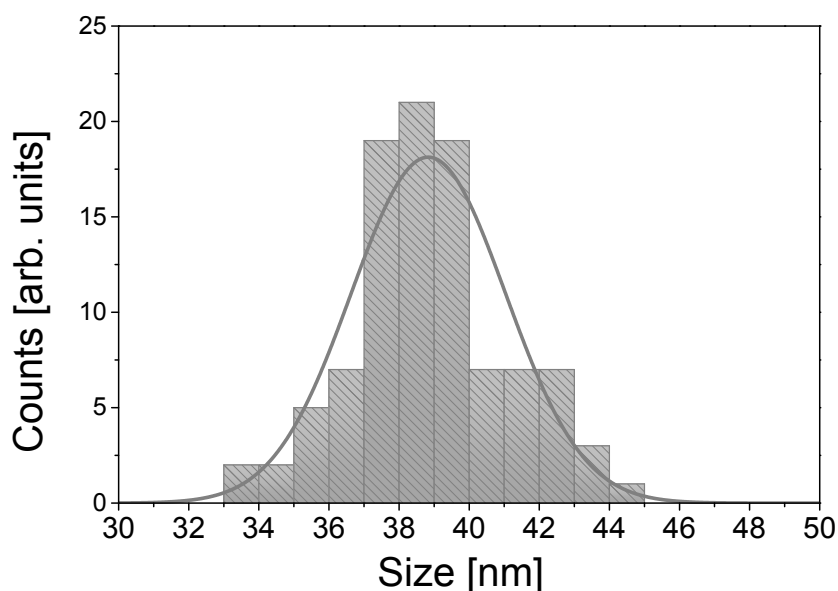

Fig.S2. Size distribution histogram of NaYF<sub>4</sub>:2%Er,20%Yb NPs obtained based on measuring the sizes of over 100 particles in the TEM images.

Table S1. Characterization of colloidal stability of NaYF<sub>4</sub>:2%Er,20%Yb NPs before and after surface treatment.

| System                      | D <sub>H</sub> [nm] | Pdl   | ζ [mV] |
|-----------------------------|---------------------|-------|--------|
| T=0 days                    |                     |       |        |
| NPs (in CHCl <sub>3</sub> ) | 82                  | 0.157 | -      |
| NPs-LCys                    | 164                 | 0.327 | 14.1   |
| NPs-LPen                    | 209                 | 0.213 | 25.6   |
| NPs-LArg                    | 301                 | 0.619 | -9.81  |
| NPs-LGlu                    | 377                 | 0.632 | -13.75 |
| T=30 days                   |                     |       |        |
| NPs-LCys                    | 407                 | 0.551 | 0.8    |
| NPs-LPen                    | 277                 | 0.287 | 24.3   |
| NPs-LArg                    | 379                 | 0.731 | -8.38  |
| NPs-LGlu                    | 419                 | 0.773 | -7.72  |

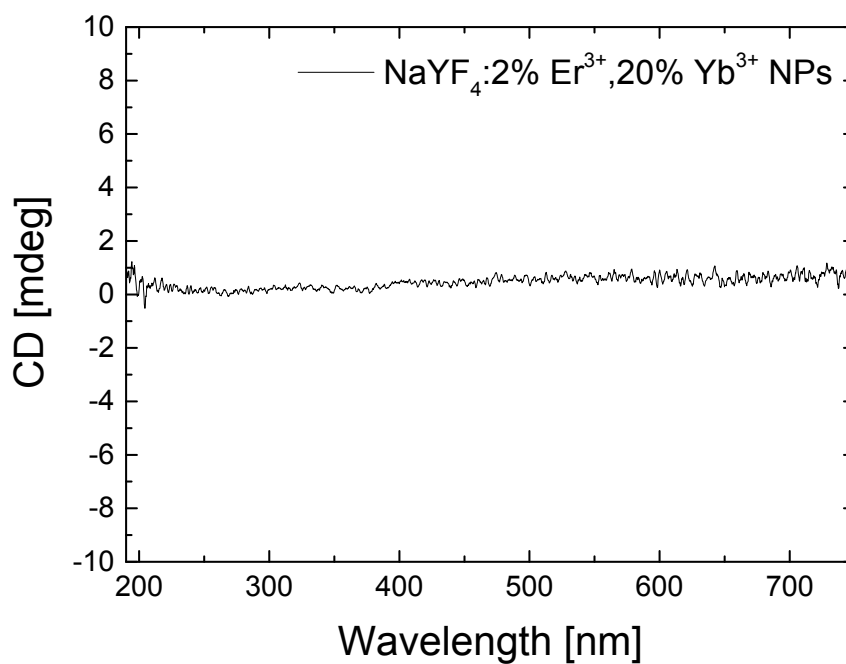

Fig.S3. CD spectra of as synthesized NaYF<sub>4</sub>:2%Er,20%Yb NPs.

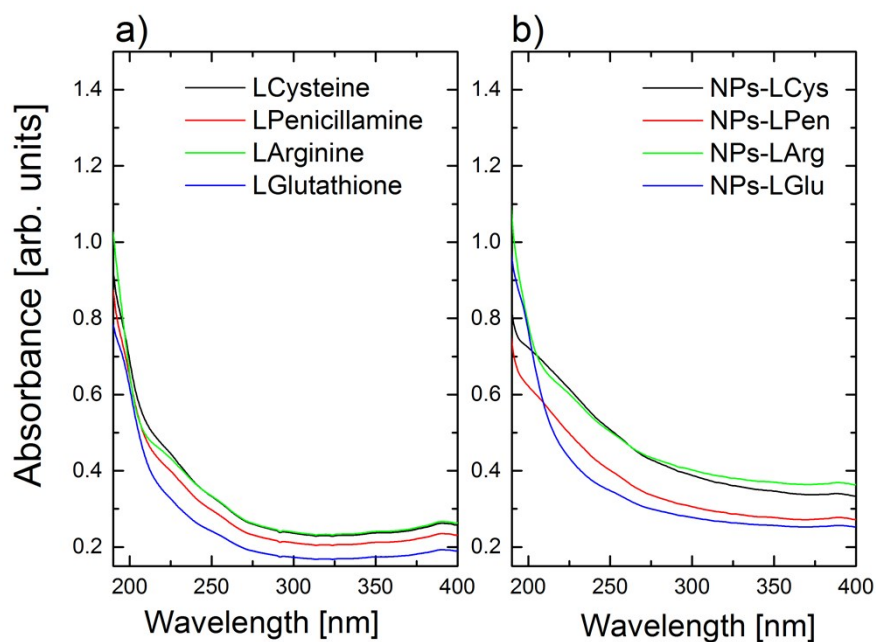

Figure S4. Absorption spectra of free chiral molecules in water solution (a) together with those for functionalized NPs (b).

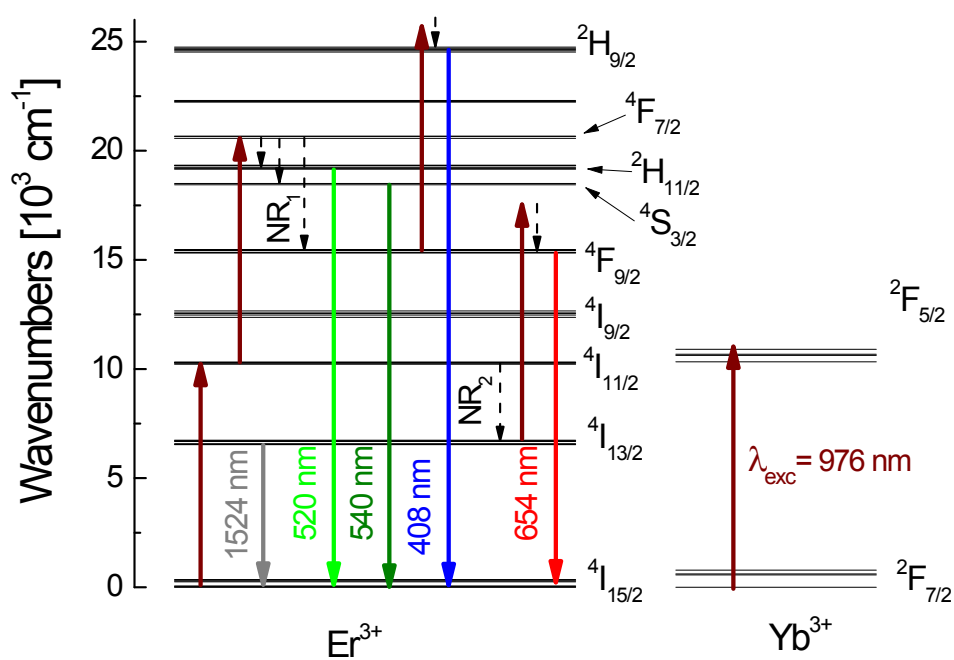

Fig.S5. Energy level diagram and proposed energy transfer mechanisms for as-synthesized and surface functionalized  $\text{NaYF}_4:2\%\text{Er},20\%\text{Yb}$  NPs after 976 nm laser diode excitation.

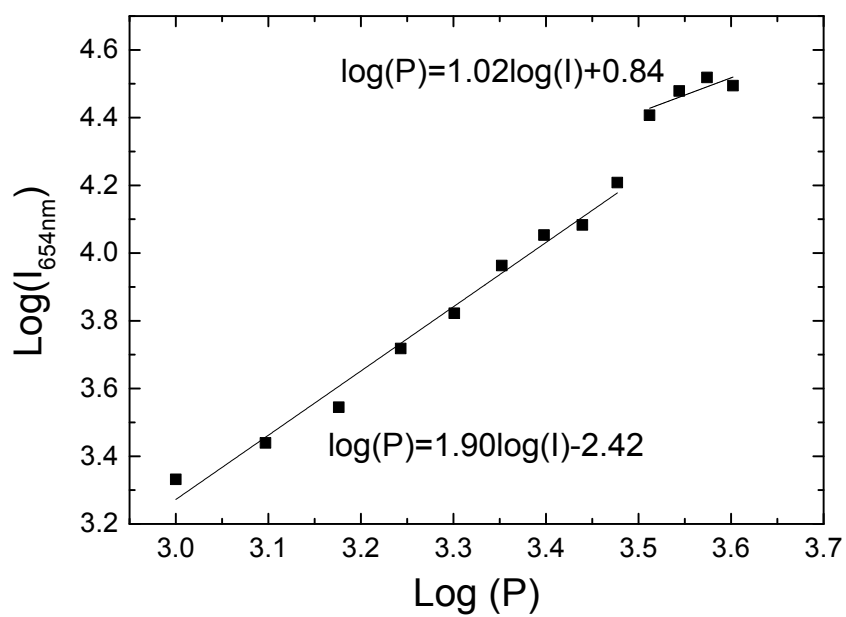

Fig.S6. Double logarithmic plot of the red ( ${}^4F_{9/2} \rightarrow {}^4I_{15/2}$ ) band luminescence integral intensity for as-synthesized NaYF<sub>4</sub>:2%Er,20%Yb NPs vs. power of the excitation laser beam with saturation regime fitted separately.
